# Supplementary material for: Crowdsourcing to design a marketing package to promote a WHO digital mental health intervention among Chinese young adults
Source: PubMed Central journal article supplement — Internet Interv. 2021 May 5;25:100397. doi: 10.1016/j.invent.2021.100397 (PMC8138601; doi:10.1016/j.invent.2021.100397), 2021-05-05
Supplement: mmc1.pdf [file mmc1.pdf]

---

---

# Health Communication Designathon

— For Global Mental Health —

---

---

# Health Communication

- Communicating promotional health information, such as in public health campaigns, TV, Ads...
- Purpose: to influence their decision-making process and health choices by improving health literacy.

# Why do we want to do the Designathon

- A significant amount of public health programs and policies were innovated, but few of the evidence-based research is known by the public.
- An **effective** communication of the health message is critical to improve the effectiveness of implementation.

# The Audience-Channel-Message-Evaluation (ACME) Framework

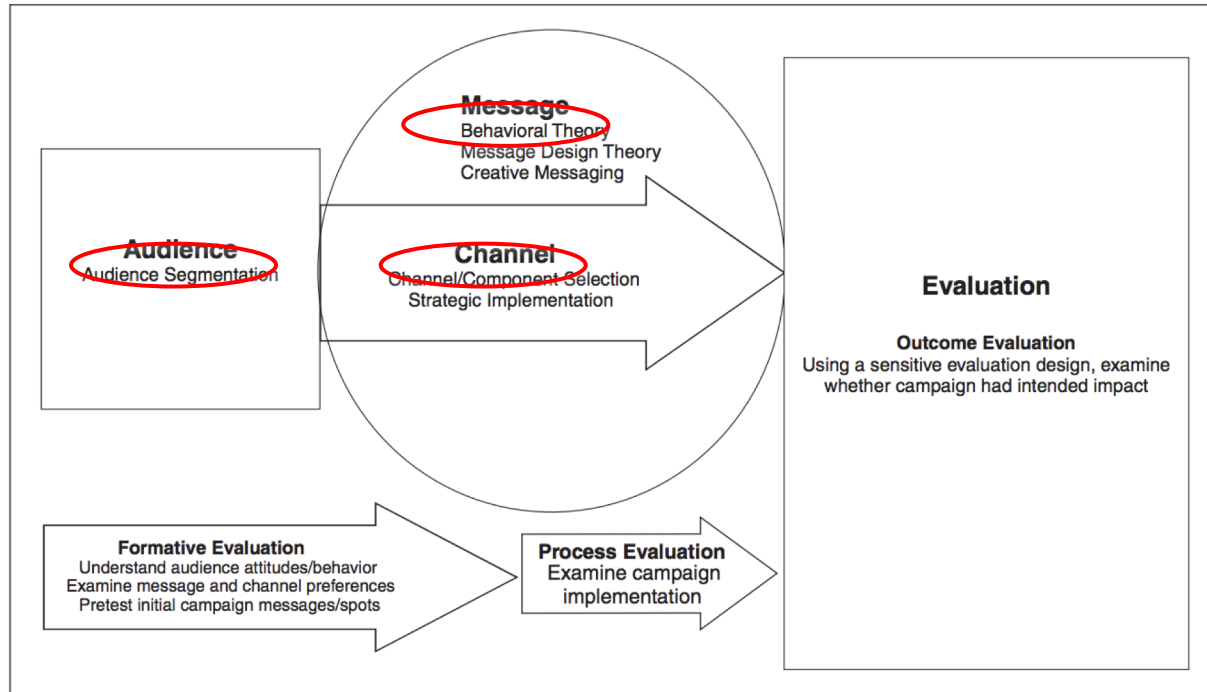

FIGURE 1 The Audience-Channel-Message-Evaluation (ACME) Framework for Health Communication Campaigns

# The Audience-Channel-Message-Evaluation (ACME) Framework

**Audience:** the population you want to reach to get them involved in your intervention and want them to change their behavior with the message they receive from your intervention.

- Who is the specific audience that your marketing plan is targeting? (How to attract their attention)

**Channel:** The media used to disseminate the message to the audience.

- The goal is to achieve “high reach (proportion of audience got exposed)” and “frequency (number of exposures)”
- Components/support material

**Message:** is what travels, what comes out of a channel to reach the target audience

- usually contain an action (what to do),
- has a tone (the tone of the message guides how the target audience will feel when they receive the message, e.g. authoritative, family-oriented, modern, collaborative, etc)
- Example in the article: “become more physically active”

# Chinese Step by Step Program

A **scalable, guided** WHO **digital** health intervention

- It is **brief**, delivered digitally, designed to be **transdiagnostic** and covers functioning and general well-being as outcomes

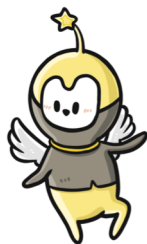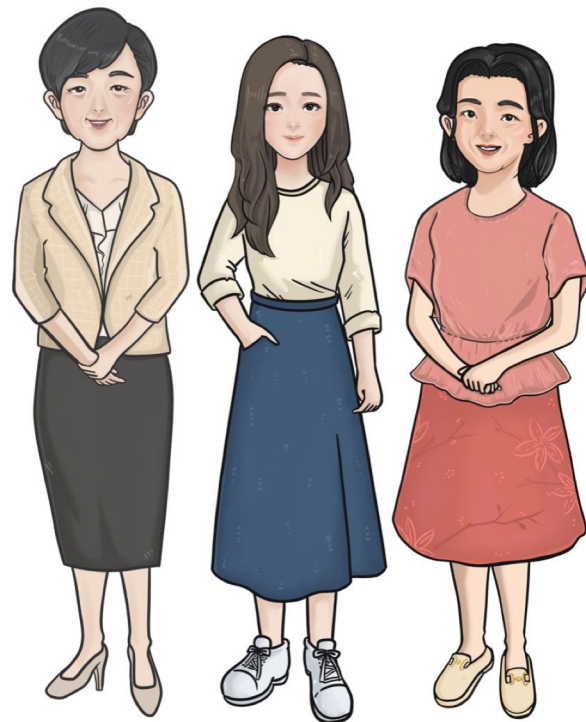

# Chinese Step by Step Program

A **scalable, guided** WHO **digital** health intervention

- It is **brief**, delivered digitally, designed to be **transdiagnostic** and covers functioning and general well-being as outcomes

# It is scalable

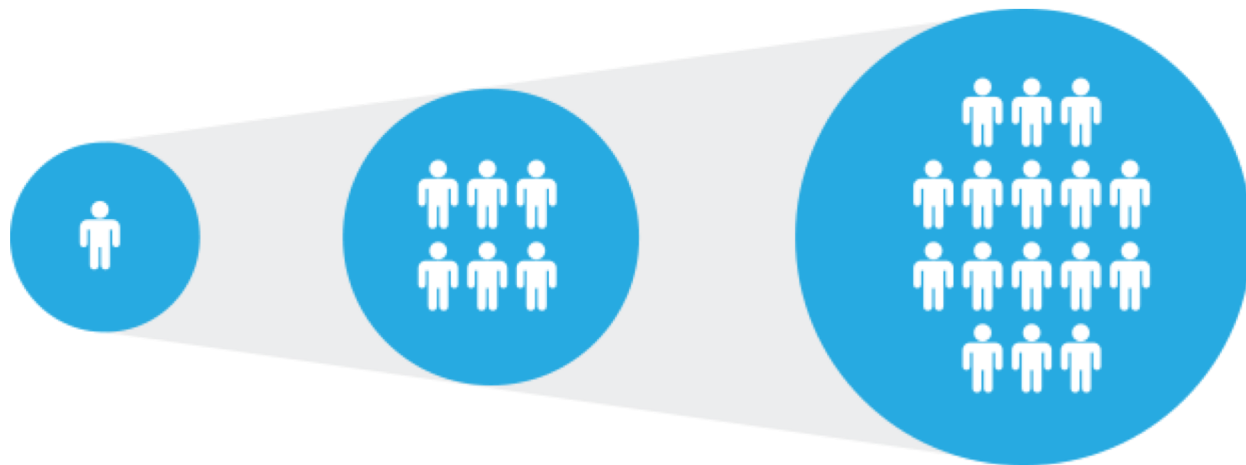



# It is guided

The program will be minimally facilitated by e-helpers

- E-helpers are lay or specialist healthcare workers (e.g., social workers)
- E-helpers provide support (e.g., technical, psychological, etc.) on a weekly basis
  - How: text message, 5 min phone call, etc.

# It is brief

It consists 5 sessions. Each session takes around 20-30 mins.

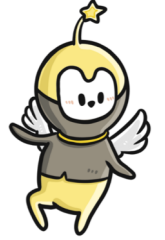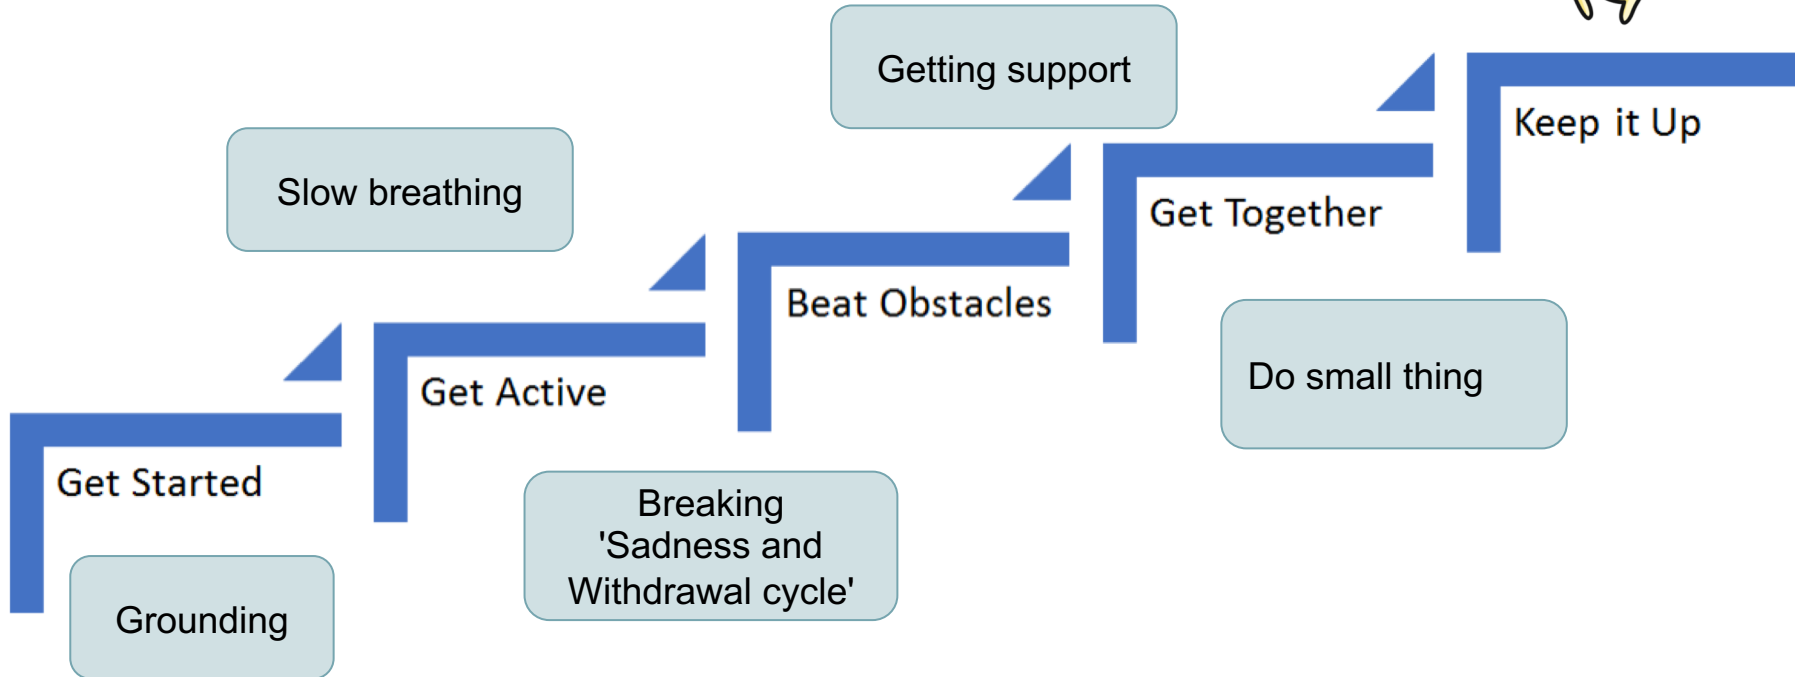

# It is transdiagnostic

Addresses depressed mood, anxiety, PTSD, other stress reactions and client-defined psychosocial problems

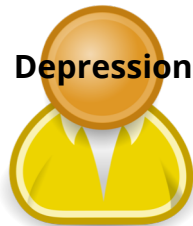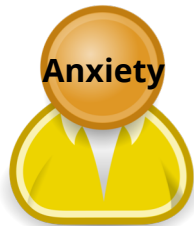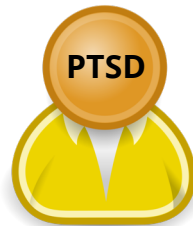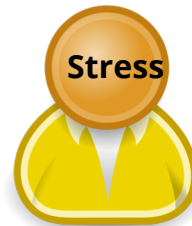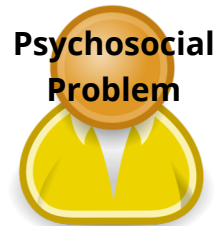

**\*\*mild to moderate**

# Designathon Outline

- **Aim:** design a marketing package for the Step by Step program
- **Learning Objectives:**
  - Global mental health
  - Communication package
  - Self-efficacy, community engagement, teamwork
- **Timeline:**
  - Day 1 (July 9): lecture, workshop
  - Days 2 & 3 (July 10-11): workshop
  - Day 4 (July 12): presentation

# Guidelines

- **Target audience:** college students in Macau
- **Components:**
  - Title
  - Health message
  - Logo
  - Slogan
  - Poster & video
- **Presentation:**
  - PowerPoint (8 minutes)
  - Q&A (5 minutes)
- Fill out template (not graded)
- Resources

# Prizes

- **First prize:** Grand resort deck day pass
- **Second prize:** Buffet dinner at Festiva (or Malaysian food festival)
- **Third prize:** UA Galaxy Cinemas Director's Club tickets (3D)

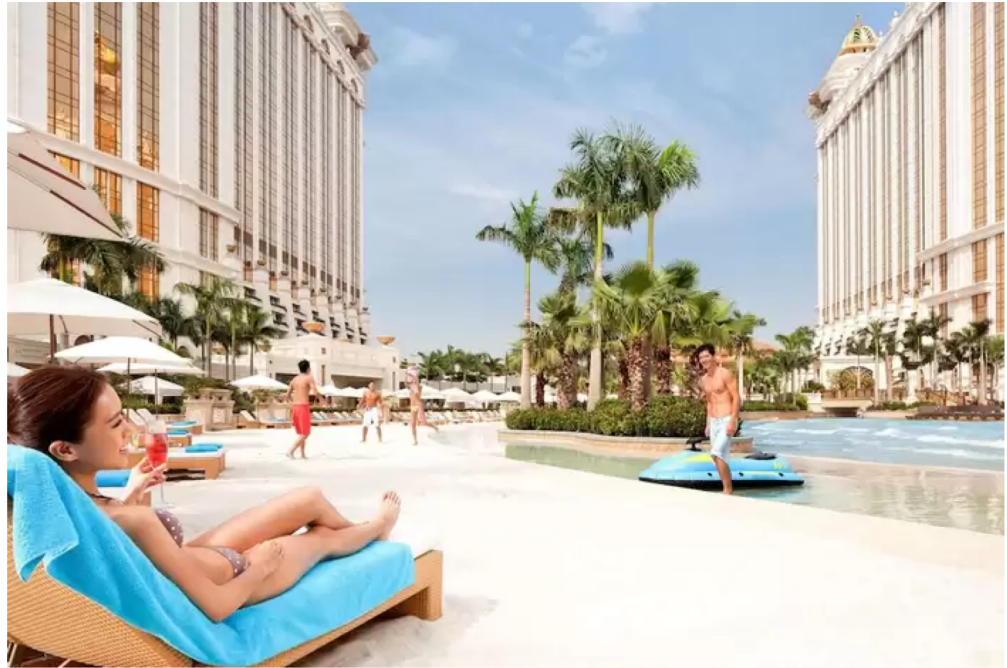

# Reference

1. Noar SM. An audience-channel-message-evaluation (ACME) framework for health communication campaigns. *Health Promot Pract* 2012 Jul;13(4):481-8. PMID: 21441207
2. Carswell K, Harper-Shehadeh M, Watts S, Van't Hof E, Abi Ramia J, Heim E, et al. Step-by-Step: a new WHO digital mental health intervention for depression. *Mhealth* 2018 Aug 13;4:34. PMID: 30225240
3. Garabiles MR, Harper Shehadeh M, Hall BJ. Cultural adaptation of a scalable World Health Organization e-mental health program for overseas filipino workers. *JMIR Form Res* 2019 Mar 29;3(1):e11600. PMID: 30924784
4. Hall BJ, Shi W, Garabiles MR, Chan EWW. Correlates of expected eMental Health intervention uptake among Filipino domestic workers in China. *Global Mental Health (Camb)* 2018 Oct 15;5:e33. PMID: 30455968
5. Muñoz RF, Bunge EL, Chen K, Schueller SM, Bravin JI, Shaughnessy EA, et al. Massive open online interventions: a novel model for delivering behavioral-health services worldwide. *Clinical Psychological Science* 2016;4(2):194-205. DOI: 10.1177/2167702615583840
6. O'Connor S, Hanlon P, O'Donnell CA, Garcia S, Glanville J, Mair FS. Understanding factors affecting patient and public engagement and recruitment to digital health interventions: a systematic review of qualitative studies. *BMC Medical Informatics and Decision Making* 2016 Sep 15;16(1):120. DOI: 10.1186/s12911-016-0359-3.
7. Claborn KR, Meier E, Miller MB, Leavens EL, Brett EI, Leffingwell T. Improving adoption and acceptability of digital health interventions for HIV disease management: a qualitative study. *Transl Behav Med* 2018 Mar 1;8(2):268-279. PMID: 29385547
8. van Gemert-Pijnen JE, Nijland N, van Limburg M, Ossbaard HC, Kelders SM, Eysenbach G, et al. A holistic framework to improve the uptake and impact of eHealth technologies. *J Med Internet Res* 2011 Dec 5;13(4):e111. PMID: 22155738
9. Tucker JD, Tang W, Li H, Liu C, Fu R, Tang S, et al. Crowdsourcing designathon: a new model for multisectoral collaboration. *BMJ Innovations* 2017 Jan 30;4(2):bmjinnov-2017. DOI: 10.1136/bmjinnov-2017-000216
10. Tucker JD, Day S, Tang W, Bayus B. Crowdsourcing in medical research: concepts and applications. *PeerJ* 2019 April 12;7:e6762. PMID: 30997295
