# Supplementary material for: Crowdsourcing to design a marketing package to promote a WHO digital mental health intervention among Chinese young adults
Source: PubMed Central journal article supplement — Internet Interv. 2021 May 5;25:100397. doi: 10.1016/j.invent.2021.100397 (PMC8138601; doi:10.1016/j.invent.2021.100397), 2021-05-05
Supplement: mmc2.pdf [file mmc2.pdf]

Multimedia Appendix 2: Criteria/Rubric for the designathon

| Elements       | Percentage         | Detailed description                                                                                                                        |                                                                                                                                                        |                                                                                                                                                        |                                                                                                                             |
|----------------|--------------------|---------------------------------------------------------------------------------------------------------------------------------------------|--------------------------------------------------------------------------------------------------------------------------------------------------------|--------------------------------------------------------------------------------------------------------------------------------------------------------|-----------------------------------------------------------------------------------------------------------------------------|
|                |                    | 10                                                                                                                                          | 9-8                                                                                                                                                    | 7-5                                                                                                                                                    | 5-0                                                                                                                         |
| Title          | 10%                | Captivating, clear and concise, very original/creative                                                                                      | Captivating, very clear and concise, some originality shown                                                                                            | Somewhat clear and concise, may be missing originality                                                                                                 | Not clear and concise, not original                                                                                         |
| Health message | 10%                | Conveys digital mental health intervention with clarity and concision, highly comprehensive and informative                                 | Conveys intervention with clarity and concision, comprehensive and informative but to a lesser degree                                                  | Does not effectively convey intervention, not as informative                                                                                           | Confusing or off-topic                                                                                                      |
| Slogan         | 5%                 | Catchy, accurately represents health message, concise                                                                                       | Accurately represents health message, concise, may not be catchy                                                                                       | Accurately conveys health message, is not concise or catchy                                                                                            | Does not accurately convey health message                                                                                   |
| Logo           | 5%                 | Very visually appealing, creative, and representative of communication package. Uses appropriate visual metaphors to represent the program. | Visually appealing and representative of communication package, may not be creative. Uses mostly appropriate visual metaphors to represent the program | Visually appealing or representative of communication package, may not be creative. Uses mostly appropriate visual metaphors to represent the program. | May not represent communication package adequately or use appropriate visual metaphors. Not visually appealing or creative. |
| Poster & Video | Presentation: 10%  | Very visually appealing and eye-catching                                                                                                    | Visually appealing and eye-catching                                                                                                                    | Less visually appealing                                                                                                                                | Visually unappealing, tacky and unprofessional                                                                              |
|                | Organization : 10% | Easy to navigate, effectively highlights most important information                                                                         | Easy to navigate, highlights some but not all important information                                                                                    | Easy to navigate, does not highlight important information                                                                                             | Difficult or confusing to navigate                                                                                          |

|       |                     |                                                                                                    |                                                                                                               |                                                                                                                         |                                                     |
|-------|---------------------|----------------------------------------------------------------------------------------------------|---------------------------------------------------------------------------------------------------------------|-------------------------------------------------------------------------------------------------------------------------|-----------------------------------------------------|
|       | Information:<br>15% | Concise, accurately<br>portrays health<br>message, uses<br>appropriate tone for<br>target audience | Accurately portrays<br>health message, uses<br>appropriate tone for<br>target audience, may<br>not be concise | Accurately portrays<br>health message, may<br>not use appropriate<br>tone for target<br>audience, may not<br>be concise | Does not<br>accurately<br>portray health<br>message |
| Total | 100%                |                                                                                                    |                                                                                                               |                                                                                                                         |                                                     |
