# Supplementary material for: Crowdsourcing to design a marketing package to promote a WHO digital mental health intervention among Chinese young adults
Source: PubMed Central journal article supplement — Internet Interv. 2021 May 5;25:100397. doi: 10.1016/j.invent.2021.100397 (PMC8138601; doi:10.1016/j.invent.2021.100397), 2021-05-05
Supplement: mmc5.pdf [file mmc5.pdf]

Multimedia Appendix 5: PHQ-9

Over the last 2 weeks, how often have you been bothered by any of the following problems:

|   |                                                                                                                                                                        | Not at all | Several days | More than half the days | Nearly every day |
|---|------------------------------------------------------------------------------------------------------------------------------------------------------------------------|------------|--------------|-------------------------|------------------|
| 1 | Little interest or pleasure in doing things                                                                                                                            | 0          | 1            | 2                       | 3                |
| 2 | Feeling down, depressed, or hopeless                                                                                                                                   | 0          | 1            | 2                       | 3                |
| 3 | Trouble falling or staying asleep, or sleeping too much                                                                                                                | 0          | 1            | 2                       | 3                |
| 4 | Feeling tired or having little energy                                                                                                                                  | 0          | 1            | 2                       | 3                |
| 5 | Poor appetite or overeating                                                                                                                                            | 0          | 1            | 2                       | 3                |
| 6 | Feeling bad about yourself—or that you are a failure or have let yourself or your family down                                                                          | 0          | 1            | 2                       | 3                |
| 7 | Trouble concentrating on things, such as reading the newspaper or watching television                                                                                  | 0          | 1            | 2                       | 3                |
| 8 | Moving or speaking so slowly that other people could have noticed. Or the opposite—being so fidgety or restless that you have been moving around a lot more than usual | 0          | 1            | 2                       | 3                |
| 9 | Thoughts that you would be better off dead or of hurting yourself in some way                                                                                          | 0          | 1            | 2                       | 3                |
