# Supplementary material for: Crowdsourcing to design a marketing package to promote a WHO digital mental health intervention among Chinese young adults
Source: PubMed Central journal article supplement — Internet Interv. 2021 May 5;25:100397. doi: 10.1016/j.invent.2021.100397 (PMC8138601; doi:10.1016/j.invent.2021.100397), 2021-05-05
Supplement: mmc6.pdf [file mmc6.pdf]

Multimedia Appendix 6: Process Evaluation: Satisfaction Survey

Designation Feedback: Please use the scale to rate the degree to which each item describes how you feel about the designathon.

|                                                                    | Strongly disagree | Disagree | Agree & disagree equally | Agree | Strongly agree |
|--------------------------------------------------------------------|-------------------|----------|--------------------------|-------|----------------|
| 1 Content of the Designation match the learning objectives.        | 1                 | 2        | 3                        | 4     | 5              |
| 2 Information and technique support are provided.                  | 1                 | 2        | 3                        | 4     | 5              |
| 3 Content of the Designation is easy to understand and follow.     | 1                 | 2        | 3                        | 4     | 5              |
| 4 Duration of the Designation is appropriate.                      | 1                 | 2        | 3                        | 4     | 5              |
| 5 Time distribution of theory and practice is appropriate.         | 1                 | 2        | 3                        | 4     | 5              |
| 6 Process of the contest is appropriate                            | 1                 | 2        | 3                        | 4     | 5              |
| 7 Diverse grouping is appropriate                                  | 1                 | 2        | 3                        | 4     | 5              |
| 8 Device and Equipment are well functioning during the Designathon | 1                 | 2        | 3                        | 4     | 5              |
| 9 Overall, the Designathon is great.                               | 1                 | 2        | 3                        | 4     | 5              |

10. Would you recommend your friends to participate in the Designation: Yes; No;

11. Comment and Feedback:
